# Supplementary material for: Conformation controlled stepwise hydride shuffling from the metal to the ligand backbone
Source: Royal Society of Chemistry journal article supplement (doi:10.1039/d0dt01431a), 2020-01-01
Supplement: d0dt01431a1.pdf [file d0dt01431a1.pdf]

## Supporting Information

# Conformation controlled stepwise hydride shuffling from the metal to the ligand backbone

Nicholas R. Wiedmaier, Hansjörg Speth, Georg Leistikow, Klaus Eichele, Hartmut Schubert, Hermann A. Mayer\*, Lars Wesemann\*

## Content

|                                                                          |    |
|--------------------------------------------------------------------------|----|
| Crystallographic Details .....                                           | 2  |
| NMR data .....                                                           | 4  |
| <sup>1</sup> H NMR spectrum of compound <b>2</b> .....                   | 4  |
| <sup>13</sup> C{ <sup>1</sup> H} NMR spectrum of compound <b>2</b> ..... | 5  |
| <sup>31</sup> P{ <sup>1</sup> H} NMR spectrum of compound <b>2</b> ..... | 6  |
| <sup>1</sup> H NMR spectrum of compound <b>3</b> .....                   | 7  |
| <sup>13</sup> C{ <sup>1</sup> H} NMR spectrum of compound <b>3</b> ..... | 8  |
| <sup>19</sup> F{ <sup>1</sup> H} NMR spectrum of compound <b>3</b> ..... | 9  |
| <sup>31</sup> P{ <sup>1</sup> H} NMR spectrum of compound <b>3</b> ..... | 10 |
| <sup>1</sup> H NMR spectrum of <b>4</b> .....                            | 11 |
| <sup>13</sup> C{ <sup>1</sup> H} NMR spectrum of <b>4</b> .....          | 12 |
| <sup>31</sup> P{ <sup>1</sup> H} NMR spectrum of <b>4</b> .....          | 13 |
| <sup>1</sup> H NMR spectrum of compound <b>5</b> .....                   | 14 |
| <sup>13</sup> C{ <sup>1</sup> H} NMR spectrum of compound <b>5</b> ..... | 15 |
| <sup>19</sup> F{ <sup>1</sup> H} NMR spectrum of compound <b>5</b> ..... | 16 |
| <sup>31</sup> P{ <sup>1</sup> H} NMR spectrum of compound <b>5</b> ..... | 17 |
| <sup>1</sup> H NMR spectrum of <b>6</b> .....                            | 18 |
| <sup>13</sup> C { <sup>1</sup> H} NMR spectrum of <b>6</b> .....         | 19 |
| <sup>31</sup> P{ <sup>1</sup> H} NMR spectrum of <b>6</b> .....          | 20 |

## Crystallographic Details

Table 1S. Selected crystallographic data for compound **2**, **3**.

|                                             | <i>syn-2</i>                                                     | <b>3</b>                                                                                                                                                                                                                 |
|---------------------------------------------|------------------------------------------------------------------|--------------------------------------------------------------------------------------------------------------------------------------------------------------------------------------------------------------------------|
| Empirical formula                           | C <sub>31</sub> H <sub>48</sub> O <sub>2</sub> P <sub>2</sub> Ru | C <sub>32</sub> H <sub>51</sub> BCl <sub>2</sub> F <sub>4</sub> O <sub>2</sub> P <sub>2</sub> Ru<br>[C <sub>31</sub> H <sub>49</sub> O <sub>2</sub> P <sub>2</sub> Ru] BF <sub>4</sub> × CH <sub>2</sub> Cl <sub>2</sub> |
| M [g·mol <sup>-1</sup> ]                    | 615.70                                                           | 788.45                                                                                                                                                                                                                   |
| λ [Å]                                       | 0.71073                                                          | 0.71073                                                                                                                                                                                                                  |
| T [K]                                       | 100(2)                                                           | 100(2)                                                                                                                                                                                                                   |
| Crystal system                              | triklin                                                          | monoklin                                                                                                                                                                                                                 |
| Space group                                 | <i>P</i> $\bar{1}$                                               | <i>P</i> 2 <sub>1</sub> / <i>c</i>                                                                                                                                                                                       |
| Z                                           | 2                                                                | 4                                                                                                                                                                                                                        |
| a [Å]                                       | 11.7759(2)                                                       | 11.9110(3)                                                                                                                                                                                                               |
| b [Å]                                       | 12.0484(2)                                                       | 12.8598(3)                                                                                                                                                                                                               |
| c [Å]                                       | 13.1386(2)                                                       | 23.6570(5)                                                                                                                                                                                                               |
| α [°]                                       | 100.4810 (10)                                                    | 90                                                                                                                                                                                                                       |
| β [°]                                       | 106.2420(10)                                                     | 98.8350(10)                                                                                                                                                                                                              |
| γ [°]                                       | 117.2990(10)                                                     | 90                                                                                                                                                                                                                       |
| V [Å <sup>3</sup> ]                         | 1481.55(4)                                                       | 3580.62(14)                                                                                                                                                                                                              |
| D <sub>c</sub> [g·cm <sup>-3</sup> ]        | 1.380                                                            | 1.463                                                                                                                                                                                                                    |
| μ [mm <sup>-1</sup> ]                       | 0.663                                                            | 0.725                                                                                                                                                                                                                    |
| F(000)                                      | 948                                                              | 1632                                                                                                                                                                                                                     |
| Crystal size [mm]                           | 0.26 x 0.13 x 0.10                                               | 0.11 x 0.15 x 0.17                                                                                                                                                                                                       |
| Θ range [°]                                 | 2.56 – 27.14                                                     | 2.35 – 29.15                                                                                                                                                                                                             |
| Limiting indices                            | -15 ≤ h ≤ 15<br>-15 ≤ k ≤ 15<br>-16 ≤ l ≤ 16                     | -16 ≤ h ≤ 16<br>-17 ≤ k ≤ 17<br>-32 ≤ l ≤ 32                                                                                                                                                                             |
| Reflections collected                       | 14133                                                            | 140096                                                                                                                                                                                                                   |
| Independent                                 | 13333                                                            | 9631                                                                                                                                                                                                                     |
| R <sub>int</sub>                            | 0.0218                                                           | 0.0248                                                                                                                                                                                                                   |
| Completeness                                | 99.9                                                             | 99.6                                                                                                                                                                                                                     |
| Absorption correction                       | Numerisch                                                        | multi-scan                                                                                                                                                                                                               |
| Max. , Min.                                 | 0.935, 0.844                                                     | 0.7458, 0.6860                                                                                                                                                                                                           |
| Parameters/restraints                       | 345/ 0                                                           | 417/ 1                                                                                                                                                                                                                   |
| R <sub>1</sub> , wR <sub>2</sub> [I>2σI]    | 0.0201, 0.0473                                                   | 0.0360, 0.0766                                                                                                                                                                                                           |
| R <sub>1</sub> , wR <sub>2</sub> (all data) | 0.0239, 0.0488                                                   | 0.0380, 0.0775                                                                                                                                                                                                           |
| GooF on F <sup>2</sup>                      | 1.039                                                            | 1.253                                                                                                                                                                                                                    |
| Peak/ hole [e·Å <sup>-3</sup> ]             | 0.442, -0.414                                                    | 0.785, -0.709                                                                                                                                                                                                            |
| CCDC                                        | 1982522                                                          | 1982525                                                                                                                                                                                                                  |

Table 2S. Selected crystallographic data for compound **5**, **6**.

|                                             | <b>5</b>                                                                                                                                                                                                | <i>syn-6</i>                                                                                                                                     |
|---------------------------------------------|---------------------------------------------------------------------------------------------------------------------------------------------------------------------------------------------------------|--------------------------------------------------------------------------------------------------------------------------------------------------|
| Empirical formula                           | C <sub>67</sub> H <sub>63</sub> BF <sub>24</sub> O <sub>2</sub> P <sub>2</sub> Ru<br>[C <sub>31</sub> H <sub>51</sub> O <sub>2</sub> P <sub>2</sub> Ru]C <sub>36</sub> H <sub>12</sub> BF <sub>24</sub> | C <sub>33</sub> H <sub>56</sub> O <sub>2.5</sub> P <sub>2</sub> Ru<br>C <sub>31</sub> H <sub>52</sub> O <sub>2</sub> P <sub>2</sub> Ru x 0.5 THF |
| M [g·mol <sup>-1</sup> ]                    | 1481.86                                                                                                                                                                                                 | 655.78                                                                                                                                           |
| λ [Å]                                       | 0.71073                                                                                                                                                                                                 | 0.71073                                                                                                                                          |
| T [K]                                       | 100(2)                                                                                                                                                                                                  | 100(2)                                                                                                                                           |
| Crystal system                              | monoklin                                                                                                                                                                                                | monoklin                                                                                                                                         |
| Space group                                 | <i>P</i> 2 <sub>1</sub> / <i>n</i>                                                                                                                                                                      | <i>P</i> 2 <sub>1</sub> / <i>c</i>                                                                                                               |
| Z                                           | 8                                                                                                                                                                                                       | 4                                                                                                                                                |
| a [Å]                                       | 12.9706(3)                                                                                                                                                                                              | 10.5466(8)                                                                                                                                       |
| b [Å]                                       | 16.5597(3)                                                                                                                                                                                              | 11.6310(8)                                                                                                                                       |
| c [Å]                                       | 31.8663(7)                                                                                                                                                                                              | 27.2772(19)                                                                                                                                      |
| α [°]                                       | 90                                                                                                                                                                                                      | 90                                                                                                                                               |
| β [°]                                       | 99.5240(10)                                                                                                                                                                                             | 98.329(3)                                                                                                                                        |
| γ [°]                                       | 90                                                                                                                                                                                                      | 90                                                                                                                                               |
| V [Å <sup>3</sup> ]                         | 6750.2(2)                                                                                                                                                                                               | 3310.7(4)                                                                                                                                        |
| D <sub>c</sub> [g·cm <sup>-3</sup> ]        | 1.458                                                                                                                                                                                                   | 1.316                                                                                                                                            |
| μ [mm <sup>-1</sup> ]                       | 0.387                                                                                                                                                                                                   | 0.599                                                                                                                                            |
| F(000)                                      | 3008                                                                                                                                                                                                    | 1392                                                                                                                                             |
| Crystal size [mm]                           | 0.18 x 0.16 x 0.14                                                                                                                                                                                      | 0.20 x 0.19 x 0.17                                                                                                                               |
| Θ range [°]                                 | 2.46 – 28.67                                                                                                                                                                                            | 3.82 – 27.88                                                                                                                                     |
| Limiting indices                            | -17 ≤ h ≤ 14<br>-22 ≤ k ≤ 22<br>-36 ≤ l ≤ 43                                                                                                                                                            | -13 ≤ h ≤ 9<br>-15 ≤ k ≤ 14<br>-35 ≤ l ≤ 35                                                                                                      |
| Reflections collected                       | 107737                                                                                                                                                                                                  | 21639                                                                                                                                            |
| Independent                                 | 17376                                                                                                                                                                                                   | 7811                                                                                                                                             |
| R <sub>int</sub>                            | 0.0310                                                                                                                                                                                                  | 0.0175                                                                                                                                           |
| Completeness                                | 99.8                                                                                                                                                                                                    | 98.7                                                                                                                                             |
| Absorption correction                       | multi-scan                                                                                                                                                                                              | multi-scan                                                                                                                                       |
| Max. , Min.                                 | 0.7458, 0.6940                                                                                                                                                                                          | 0.7456, 0.7044                                                                                                                                   |
| Parameters/restraints                       | 882/ 0                                                                                                                                                                                                  | 362/ 8                                                                                                                                           |
| R <sub>1</sub> , wR <sub>2</sub> [I>2σI]    | 0.0418, 0.1026                                                                                                                                                                                          | 0.0251, 0.0564                                                                                                                                   |
| R <sub>1</sub> , wR <sub>2</sub> (all data) | 0.0532, 0.1098                                                                                                                                                                                          | 0.0297, 0.0584                                                                                                                                   |
| Goof on F <sup>2</sup>                      | 1.028                                                                                                                                                                                                   | 1.026                                                                                                                                            |
| Peak/ hole [e·Å <sup>-3</sup> ]             | 1.675, -1.348                                                                                                                                                                                           | 0.634, -0.957                                                                                                                                    |
| CCDC                                        | 1982524                                                                                                                                                                                                 | 1982523                                                                                                                                          |

## NMR data

<sup>1</sup>H NMR spectrum of compound **2**

1H\_NMR\_C6D6\_BCHT-PtBu2-Ru(CO)2H

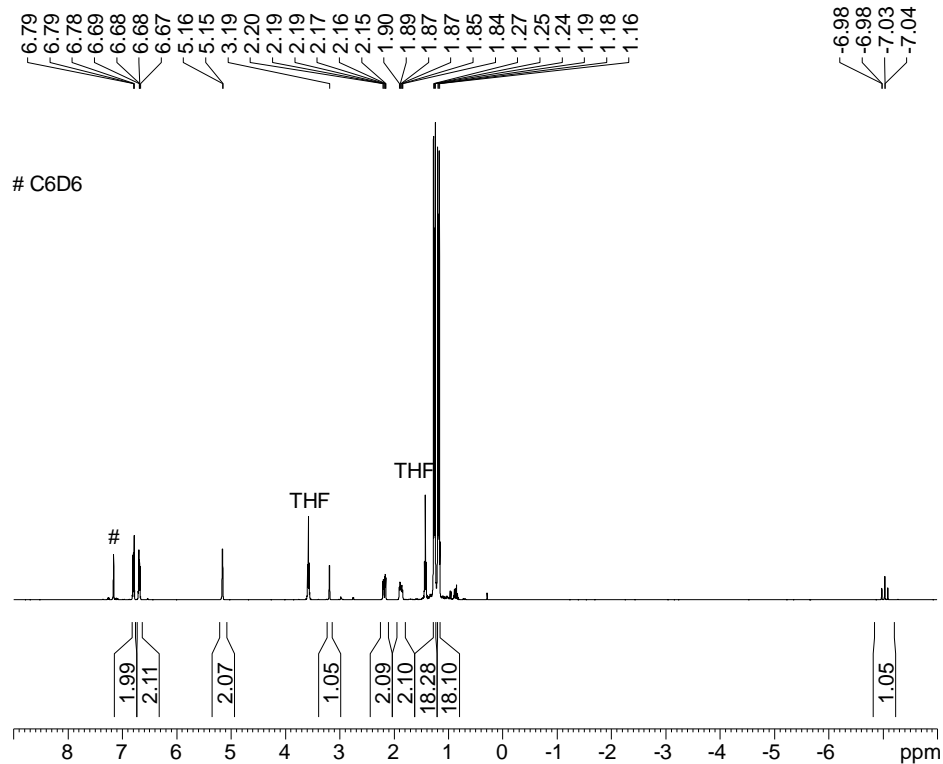

Current Data Parameters  
 NAME GL1-060618-Nacht  
 EXPNO 10  
 PROCNO 1

F2 - Acquisition Parameters  
 Date\_ 20180606  
 Time 20.04  
 INSTRUM spect  
 PROBHD 5 mm QNP 1H/13  
 PULPROG zg30  
 TD 52656  
 SOLVENT C6D6  
 NS 32  
 DS 0  
 SWH 12019.230 Hz  
 FIDRES 0.228259 Hz  
 AQ 2.1904895 sec  
 RG 161  
 DW 41.600 usec  
 DE 6.00 usec  
 TE 300.2 K  
 D1 1.00000000 sec  
 TD0 1

===== CHANNEL f1 =====  
 NUC1 1H  
 P1 14.60 usec  
 PL1 -3.00 dB  
 PL1W 16.03799057 W  
 SFO1 400.1100000 MHz

F2 - Processing parameters  
 SI 65536  
 SF 400.1099934 MHz  
 WDW EM  
 SSB 0  
 LB 0 Hz  
 GB 0  
 PC 1.00

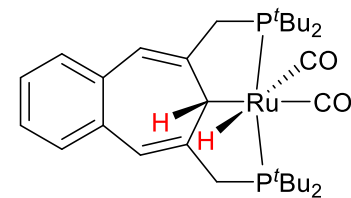*syn-2*

$^{13}\text{C}\{^1\text{H}\}$  NMR spectrum of compound **2**

13C\_NMR\_C6D6\_BCHT-PtBu2-Ru(CO)2H

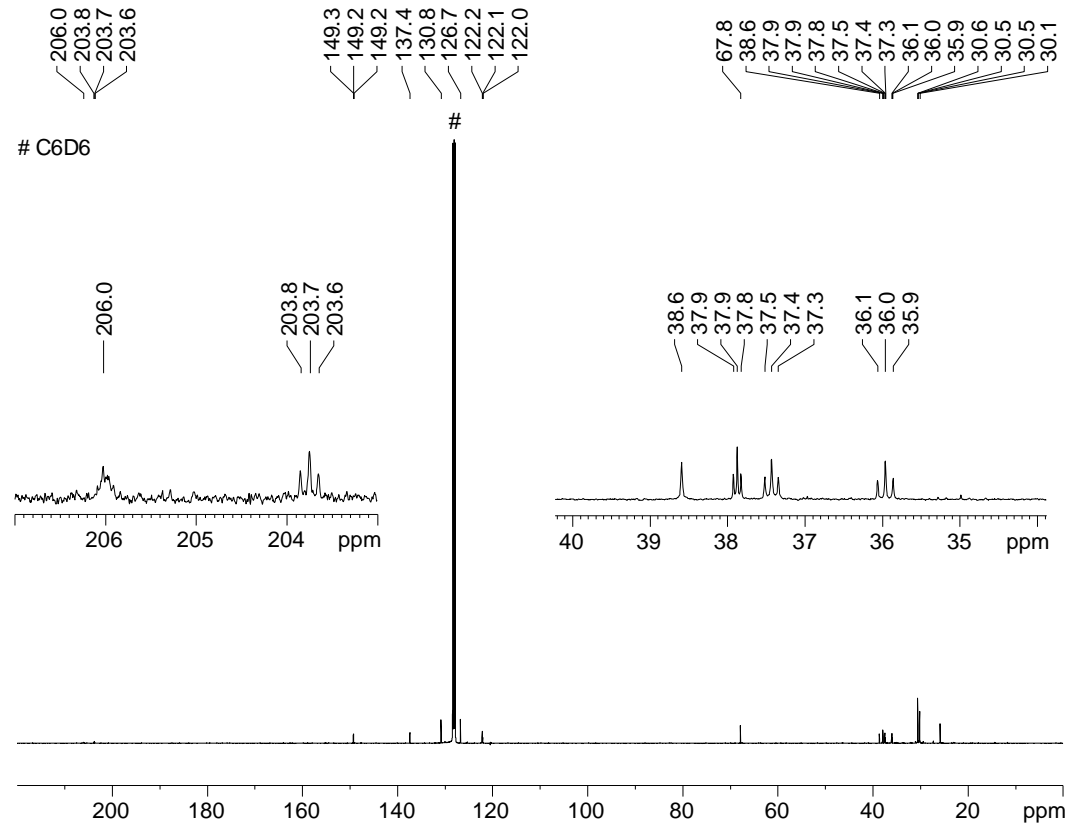

Current Data Parameters  
 NAME GL1-060618-Nacht\_2  
 EXPNO 16  
 PROCNO 1

F2 - Acquisition Parameters  
 Date\_ 20180607  
 Time 7.18  
 INSTRUM spect  
 PROBHD 5 mm QNP 1H/13  
 PULPROG zgpg30  
 TD 53700  
 SOLVENT C6D6  
 NS 15000  
 DS 0  
 SWH 30864.197 Hz  
 FIDRES 0.574752 Hz  
 AQ 0.8699400 sec  
 RG 32800  
 DW 16.200 usec  
 DE 6.00 usec  
 TE 300.2 K  
 D1 1.00000000 sec  
 D11 0.03000000 sec  
 TD0 1

===== CHANNEL f1 =====  
 NUC1 13C  
 P1 13.50 usec  
 PL1 -4.16 dB  
 PL1W 78.55633545 W  
 SFO1 100.6198135 MHz

===== CHANNEL f2 =====  
 CPDPRG2 waltz16  
 NUC2 1H  
 PCPD2 80.00 usec  
 PL2 -3.00 dB  
 PL12 11.77 dB  
 PL13 13.14 dB  
 PL2W 16.03799057 W  
 PL12W 0.53474891 W  
 PL13W 0.39007664 W  
 SFO2 400.1120007 MHz

F2 - Processing parameters  
 SI 65536  
 SF 100.6077005 MHz  
 WDW EM  
 SSB 0  
 LB 1.00 Hz  
 GB 0  
 PC 1.40

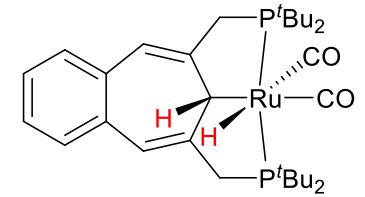**syn-2**

$^{31}\text{P}\{^1\text{H}\}$  NMR spectrum of compound **2**

31P\_NMR\_C6D6\_BCHT-PtBu2-Ru(CO)2H

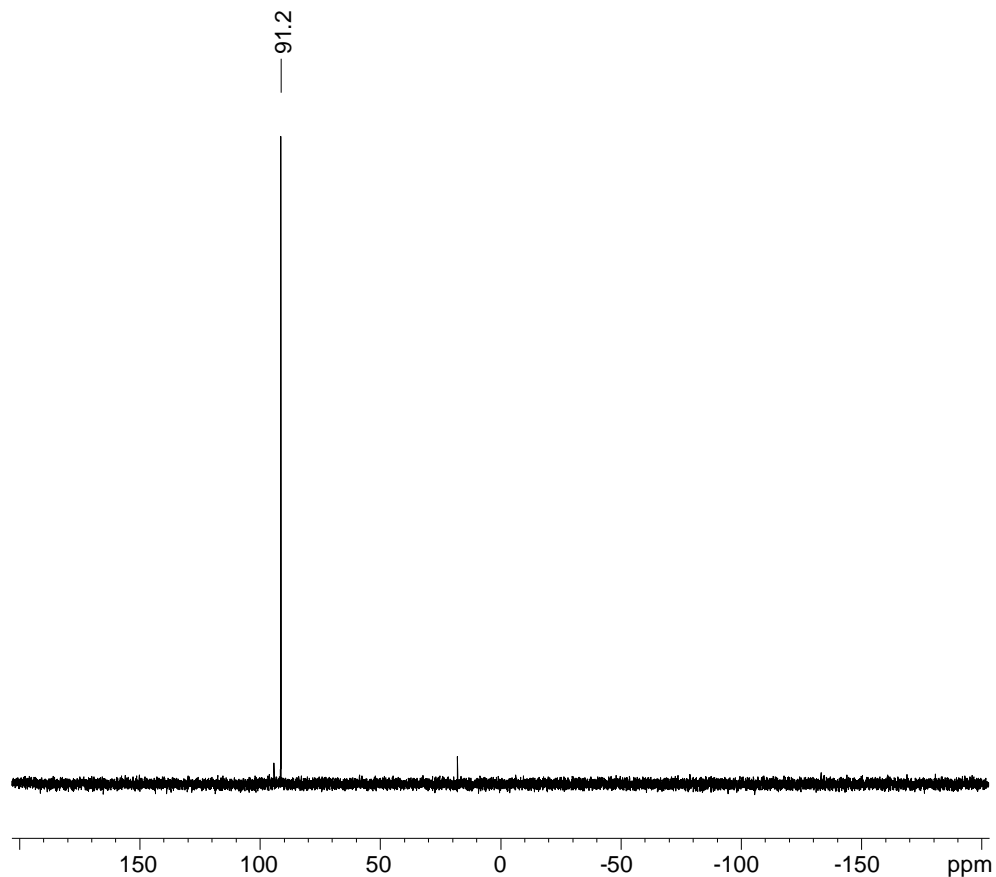

Current Data Parameters  
 NAME GL1-060618-Nacht  
 EXPNO 11  
 PROCNO 1

F2 - Acquisition Parameters  
 Date\_ 20180606  
 Time 20.07  
 INSTRUM spect  
 PROBHD 5 mm QNP 1H/13  
 PULPROG zgpg30  
 TD 88150  
 SOLVENT C6D6  
 NS 64  
 DS 0  
 SWH 65789.477 Hz  
 FIDRES 0.746336 Hz  
 AQ 0.6699400 sec  
 RG 23100  
 DW 7.600 usec  
 DE 6.00 usec  
 TE 300.2 K  
 D1 1.00000000 sec  
 D11 0.03000000 sec  
 TD0 1

===== CHANNEL f1 =====  
 NUC1 31P  
 P1 11.00 usec  
 PL1 -3.00 dB  
 PL1W 45.10684967 W  
 SFO1 161.9674970 MHz

===== CHANNEL f2 =====  
 CPDPRG2 waltz16  
 NUC2 1H  
 PCPD2 80.00 usec  
 PL2 -3.00 dB  
 PL12 11.77 dB  
 PL13 13.14 dB  
 PL2W 16.03799057 W  
 PL12W 0.53474891 W  
 PL13W 0.39007664 W  
 SFO2 400.1120007 MHz

F2 - Processing parameters  
 SI 131072  
 SF 161.9674970 MHz  
 WDW EM  
 SSB 0  
 LB 3.00 Hz  
 GB 0  
 PC 1.40

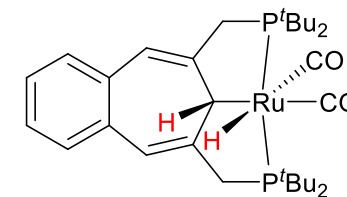**syn-2**

<sup>1</sup>H NMR spectrum of compound **3**

1H\_NMR\_CD2Cl2\_(BCHD-PtBu2-Ru(CO)2)BArF24

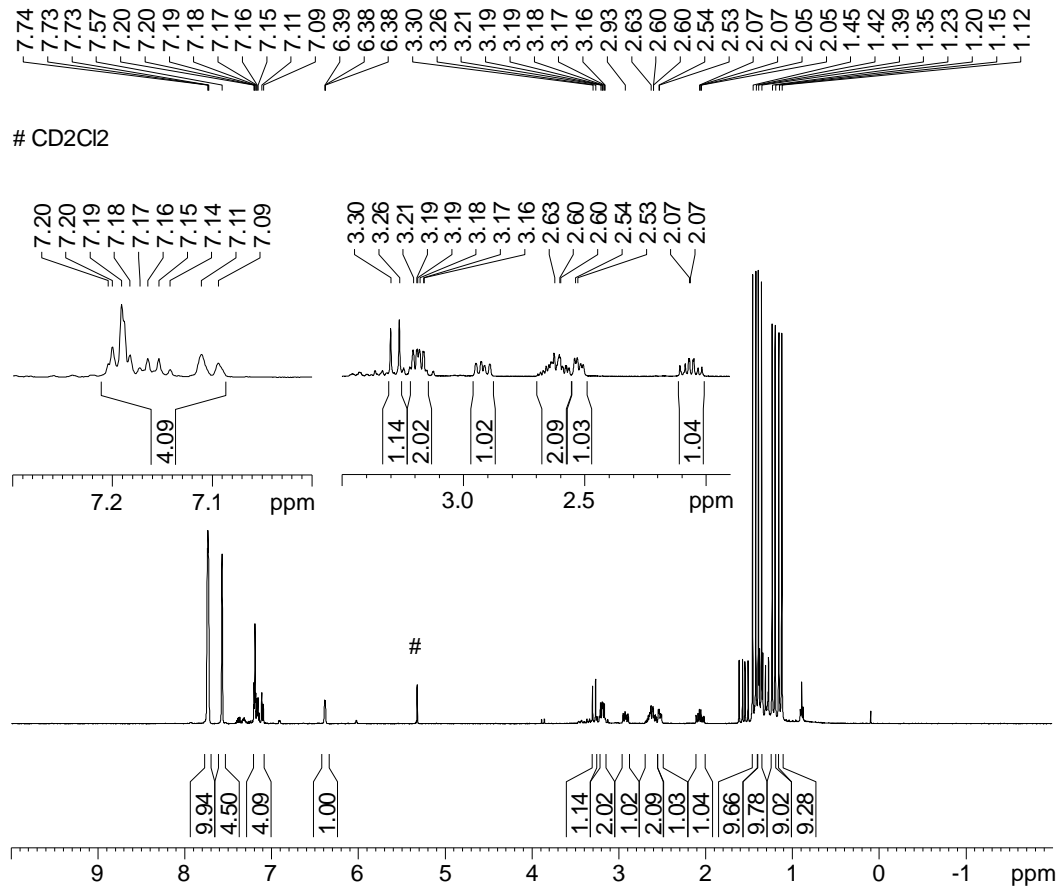

Current Data Parameters  
 NAME NW53-130718-Nacht  
 EXPNO 10  
 PROCNO 1

F2 - Acquisition Parameters  
 Date\_ 20180713  
 Time 20.05  
 INSTRUM spect  
 PROBHD 5 mm QNP 1H/13  
 PULPROG zg30  
 TD 52656  
 SOLVENT CD2Cl2  
 NS 16  
 DS 0  
 SWH 16025.641 Hz  
 FIDRES 0.304346 Hz  
 AQ 1.6428672 sec  
 RG 228  
 DW 31.200 usec  
 DE 6.00 usec  
 TE 300.2 K  
 D1 1.00000000 sec  
 TD0 1

===== CHANNEL f1 =====  
 NUC1 1H  
 P1 14.60 usec  
 PL1 -3.00 dB  
 PL1W 16.03799057 W  
 SFO1 400.1100000 MHz

F2 - Processing parameters  
 SI 65536  
 SF 400.1100114 MHz  
 WDW EM  
 SSB 0  
 LB 0 Hz  
 GB 0  
 PC 1.00

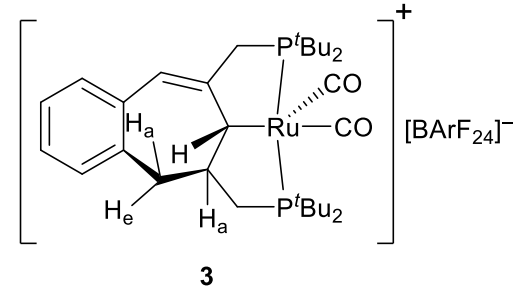

$^{13}\text{C}\{^1\text{H}\}$  NMR spectrum of compound **3**

13C\_NMR\_CD2Cl2\_(BCHD-PtBu2-Ru(CO)2)BARF24

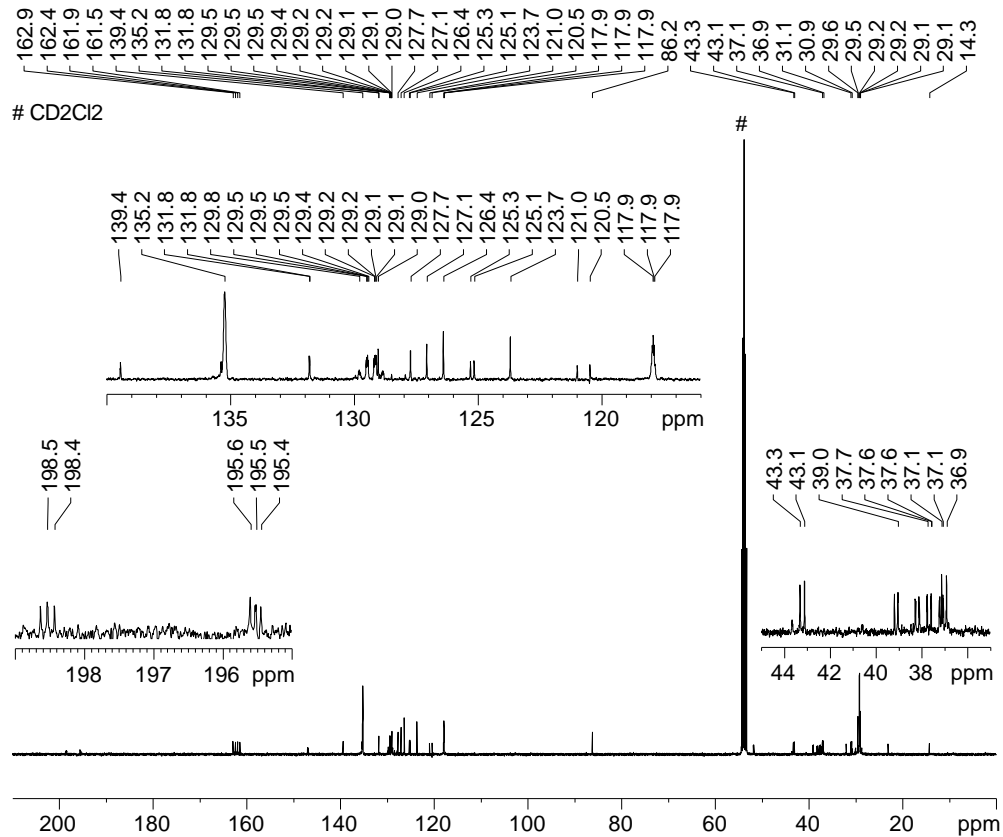

Current Data Parameters  
 NAME NW53-130718-Nacht  
 EXPNO 17  
 PROCNO 1

F2 - Acquisition Parameters  
 Date\_ 20180714  
 Time 7.18  
 INSTRUM spect  
 PROBHD 5 mm QNP 1H/13  
 PULPROG zgpg30  
 TD 53700  
 SOLVENT CD2Cl2  
 NS 15000  
 DS 0  
 SWH 30864.197 Hz  
 FIDRES 0.574752 Hz  
 AQ 0.8699400 sec  
 RG 32800  
 DW 16.200 usec  
 DE 6.00 usec  
 TE 300.2 K  
 D1 1.00000000 sec  
 D11 0.03000000 sec  
 TD0 1

===== CHANNEL f1 =====  
 NUC1 13C  
 P1 13.50 usec  
 PL1 -4.16 dB  
 PL1W 78.55633545 W  
 SFO1 100.6198135 MHz

===== CHANNEL f2 =====  
 CPDPRG2 waltz16  
 NUC2 1H  
 PCPD2 80.00 usec  
 PL2 -3.00 dB  
 PL12 11.77 dB  
 PL13 13.14 dB  
 PL2W 16.03799057 W  
 PL12W 0.53474891 W  
 PL13W 0.39007664 W  
 SFO2 400.1120007 MHz

F2 - Processing parameters  
 SI 65536  
 SF 100.6076933 MHz  
 WDW EM  
 SSB 0  
 LB 1.00 Hz  
 GB 0  
 PC 1.40

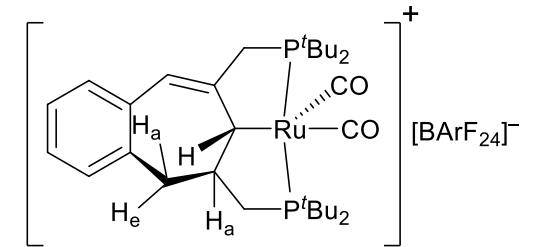**3**



$^{19}\text{F}\{^1\text{H}\}$  NMR spectrum of compound 3

19F\_NMR\_CD2Cl2\_(BCHD-PtBu2-Ru(CO)2)BARF24

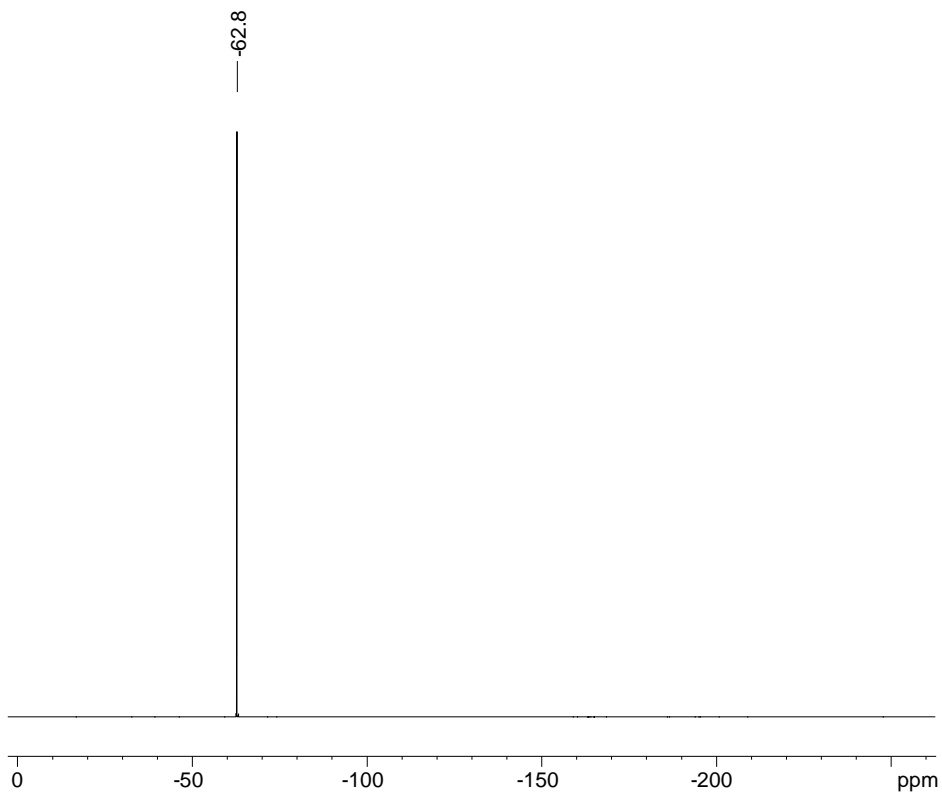

Current Data Parameters  
 NAME NW53-130718-Nacht  
 EXPNO 12  
 PROCNO 1

F2 - Acquisition Parameters  
 Date\_ 20180713  
 Time 20.07  
 INSTRUM spect  
 PROBHD 5 mm QNP 1H/13  
 PULPROG zgfhigqn  
 TD 131072  
 SOLVENT CD2Cl2  
 NS 32  
 DS 0  
 SWH 100000.000 Hz  
 FIDRES 0.762939 Hz  
 AQ 0.6553600 sec  
 RG 4100  
 DW 5.000 usec  
 DE 6.00 usec  
 TE 300.2 K  
 D1 1.00000000 sec  
 D11 0.03000000 sec  
 D12 0.00002000 sec  
 TD0 1

===== CHANNEL f1 =====  
 NUC1 19F  
 P1 18.75 usec  
 PL1 -2.92 dB  
 PL1W 30.50645256 W  
 SFO1 376.4306030 MHz

===== CHANNEL f2 =====  
 CPDPRG[2] waltz16  
 NUC2 1H  
 PCPD2 80.00 usec  
 PL2 -3.00 dB  
 PL12 11.77 dB  
 PL2W 16.03799057 W  
 PL12W 0.53474891 W  
 SFO2 400.1120007 MHz

F2 - Processing parameters  
 SI 262144  
 SF 376.4795470 MHz  
 WDW EM  
 SSB 0  
 LB 2.00 Hz  
 GB 0  
 PC 1.00

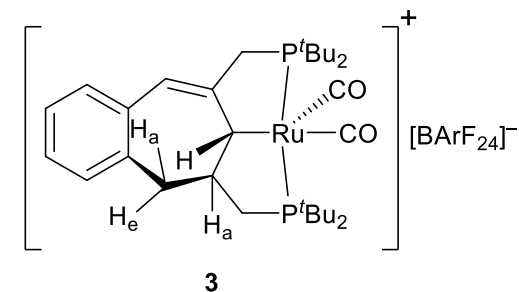

$^{31}\text{P}\{^1\text{H}\}$  NMR spectrum of compound **3**

31P\_NMR\_CD2Cl2\_(BCHD-PtBu2-Ru(CO)2)BARF24

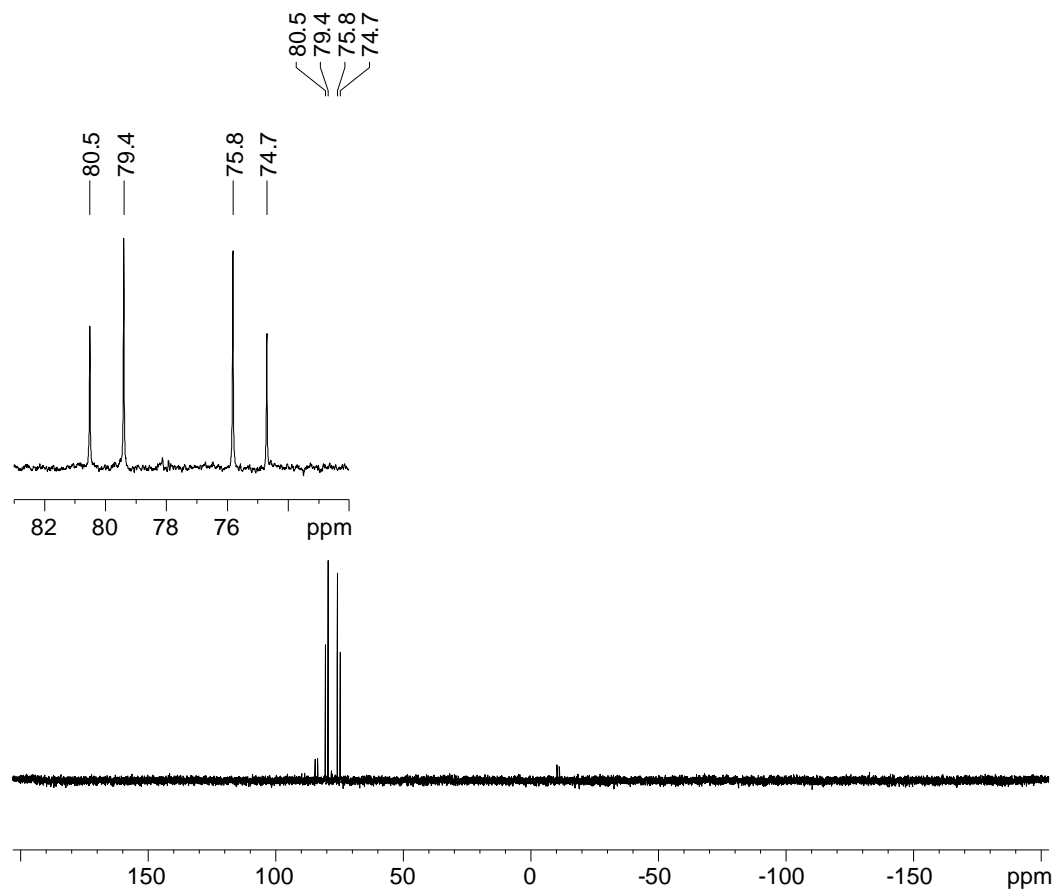

Current Data Parameters  
 NAME NW53-130718-Nacht  
 EXPNO 11  
 PROCNO 1

F2 - Acquisition Parameters  
 Date\_ 20180713  
 Time 20.06  
 INSTRUM spect  
 PROBHD 5 mm QNP 1H/13  
 PULPROG zgpg30  
 TD 88150  
 SOLVENT CD2Cl2  
 NS 32  
 DS 0  
 SWH 65789.477 Hz  
 FIDRES 0.746336 Hz  
 AQ 0.6699400 sec  
 RG 23100  
 DW 7.600 usec  
 DE 6.00 usec  
 TE 300.2 K  
 D1 1.00000000 sec  
 D11 0.03000000 sec  
 TD0 1

===== CHANNEL f1 =====  
 NUC1  $^{31}\text{P}$   
 P1 11.00 usec  
 PL1 -3.00 dB  
 PL1W 45.10684967 W  
 SFO1 161.9674970 MHz

===== CHANNEL f2 =====  
 CPDPRG[2] waltz16  
 NUC2  $^1\text{H}$   
 PCPD2 80.00 usec  
 PL2 -3.00 dB  
 PL12 11.77 dB  
 PL13 13.14 dB  
 PL2W 16.03799057 W  
 PL12W 0.53474891 W  
 PL13W 0.39007664 W  
 SFO2 400.1120007 MHz

F2 - Processing parameters  
 SI 131072  
 SF 161.9674970 MHz  
 WDW EM  
 SSB 0  
 LB 3.00 Hz  
 GB 0  
 PC 1.40

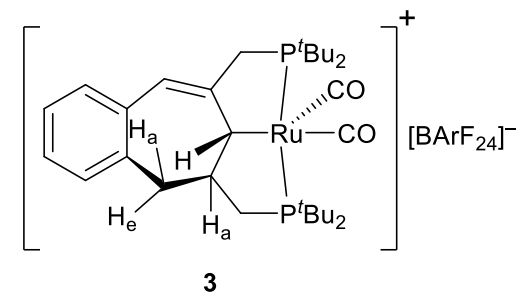

<sup>1</sup>H NMR spectrum of **4**

1H\_NMR\_C6D6\_BCHD-PtBu2-Ru(CO)2H

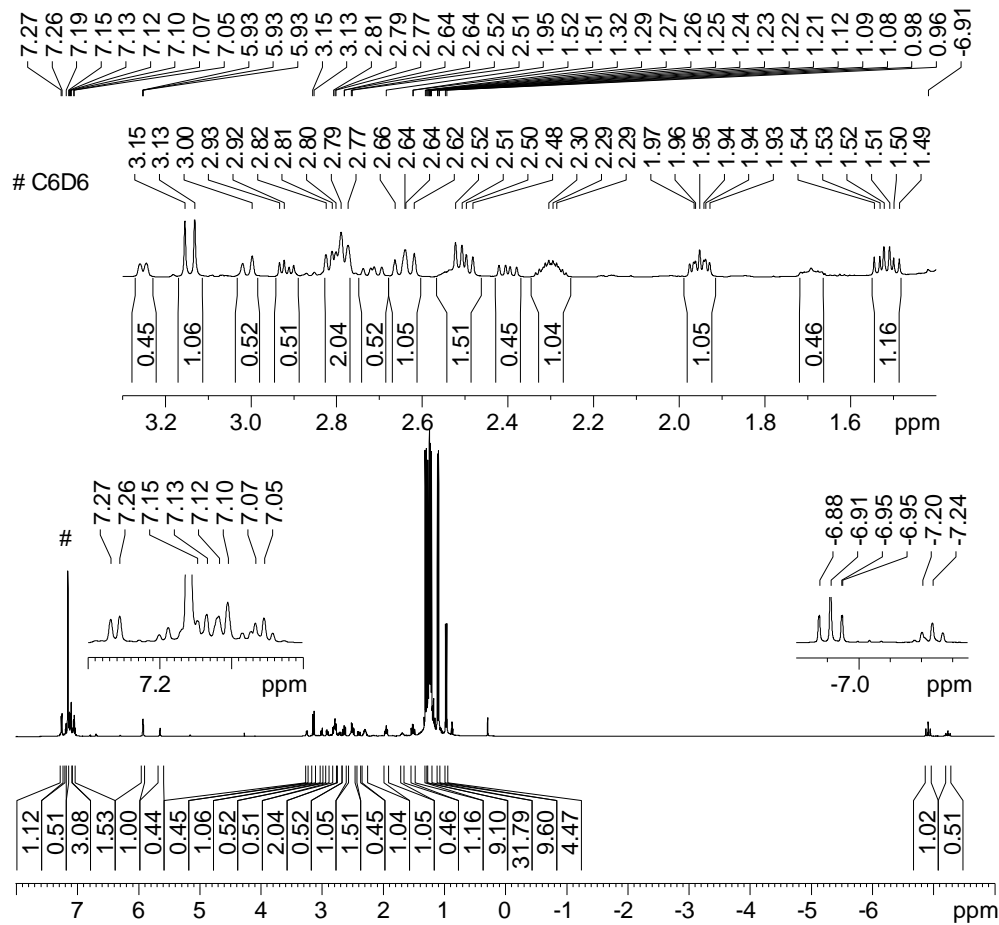

Current Data Parameters  
 NAME NW103-29112018-600-Nacht  
 EXPNO 10  
 PROCNO 1

F2 - Acquisition Parameters  
 Date\_ 20181129  
 Time 14.30 h  
 INSTRUM spect  
 PROBHD Z126545\_0027 (  
 PULPROG zg30  
 TD 65536  
 SOLVENT C6D6  
 NS 64  
 DS 0  
 SWH 9615.385 Hz  
 FIDRES 0.293438 Hz  
 AQ 3.4078720 sec  
 RG 17.08  
 DW 52.000 usec  
 DE 10.00 usec  
 TE 298.0 K  
 D1 1.00000000 sec  
 TD0 1  
 SFO1 600.1300000 MHz  
 NUC1 1H  
 P1 12.00 usec  
 PLW1 23.41200066 W

F2 - Processing parameters  
 SI 65536  
 SF 600.1299951 MHz  
 WDW EM  
 SSB 0  
 LB 0.30 Hz  
 GB 0  
 PC 1.00

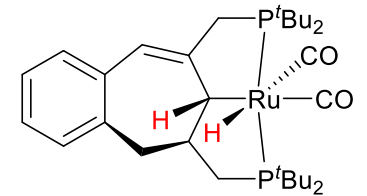*syn-4*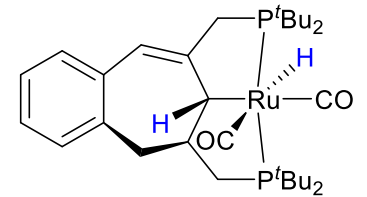*anti-4*

$^{13}\text{C}\{^1\text{H}\}$  NMR spectrum of 4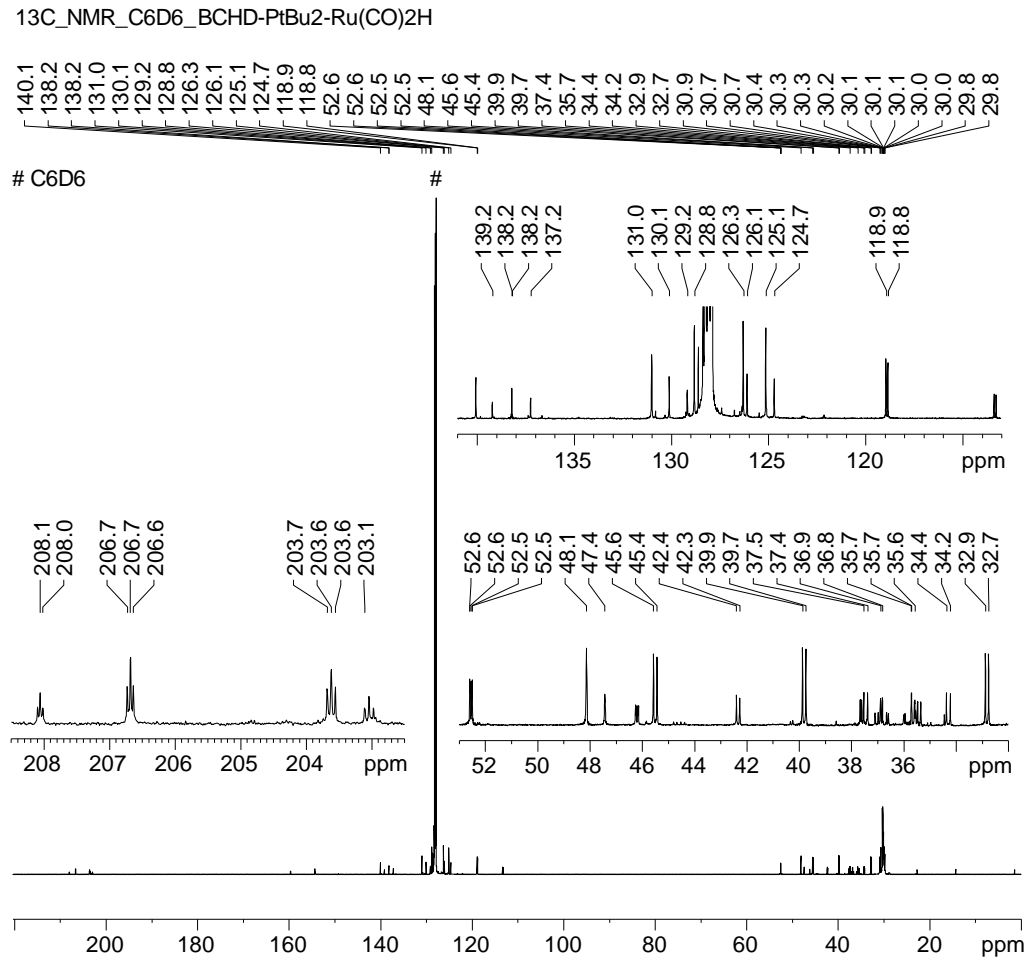

Current Data Parameters  
 NAME NW103-29112018-600-Nacht  
 EXPNO 11  
 PROCNO 1

F2 - Acquisition Parameters  
 Date\_ 20181129  
 Time 18.36 h  
 INSTRUM spect  
 PROBHD Z126545\_0027 (  
 PULPROG udef  
 TD 25902  
 SOLVENT C6D6  
 NS 3072  
 DS 0  
 SWH 36231.883 Hz  
 FIDRES 2.797613 Hz  
 AQ 0.3574476 sec  
 RG 189.6  
 DW 13.800 usec  
 DE 18.00 usec  
 TE 298.0 K  
 D1 4.00000000 sec  
 D12 0.00002000 sec  
 D20 25.00000000 sec  
 TD0 1  
 SFO1 150.9178988 MHz  
 NUC1 13C  
 P1 10.00 usec  
 P13 2000.00 usec  
 P26 500.00 usec  
 PLW1 57.02700043 W  
 SPNAM[5] Crp60comp.4  
 SPOAL5 0.500  
 SPOFFS5 0 Hz  
 SPW5 8.71310043 W  
 SPNAM[8] Crp60,0.5,20.1  
 SPOAL8 0.500  
 SPOFFS8 0 Hz  
 SPW8 8.71310043 W  
 SFO2 600.1300000 MHz  
 NUC2 1H  
 CPDPRG[2] waltz16  
 PCPD2 70.00 usec  
 PLW2 23.41200066 W  
 PLW12 0.68803000 W

F2 - Processing parameters  
 SI 32768  
 SF 150.9027515 MHz  
 WDW EM  
 SSB 0  
 LB 1.00 Hz  
 GB 0  
 PC 1.40

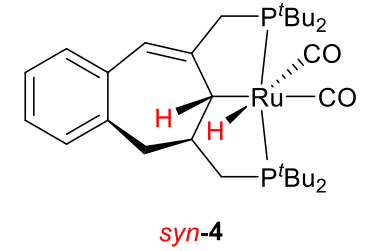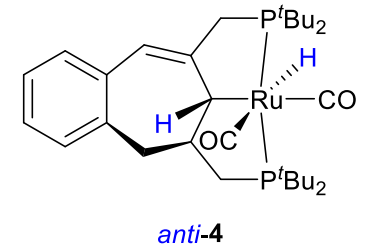

$^{31}\text{P}\{^1\text{H}\}$  NMR spectrum of 4

31P\_NMR\_C6D6\_BCHD-PtBu2-Ru(CO)2H

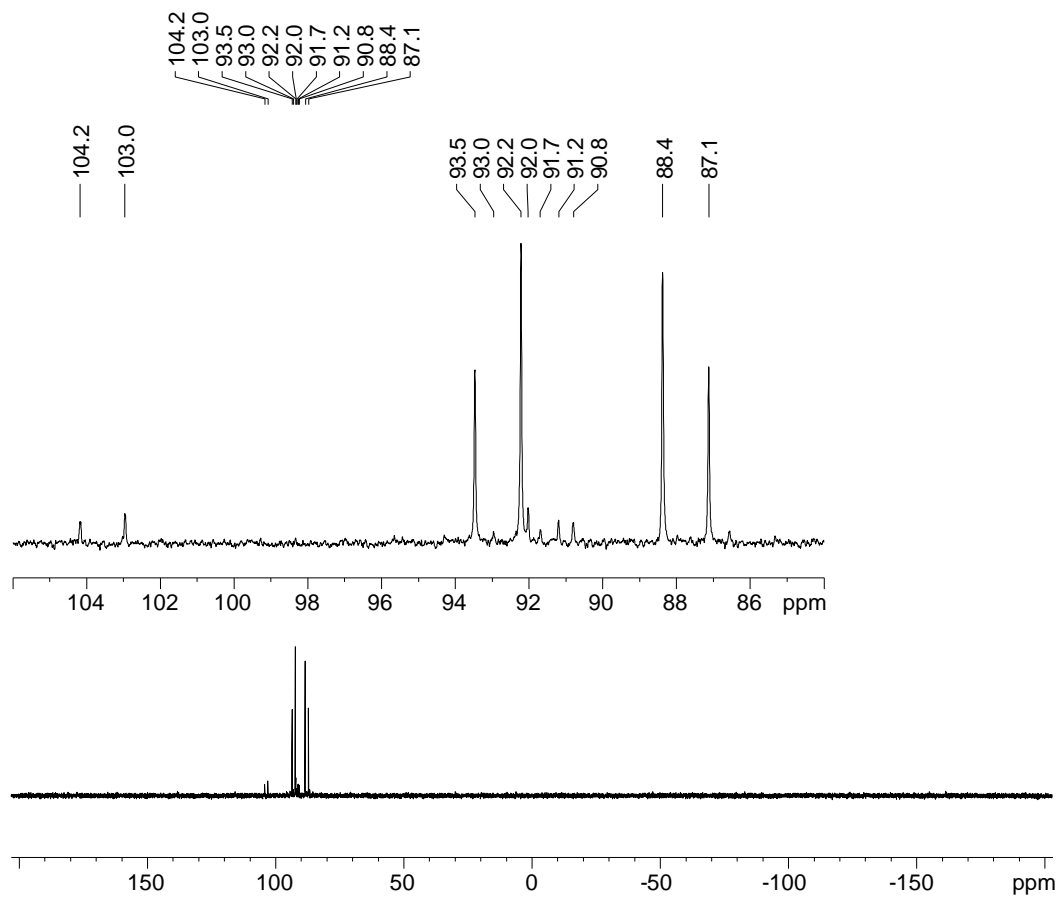

Current Data Parameters  
 NAME NW103-231118-1  
 EXPNO 11  
 PROCNO 1

F2 - Acquisition Parameters  
 Date\_ 20181123  
 Time 15.31  
 INSTRUM spect  
 PROBHD 5 mm QNP 1H/13  
 PULPROG zgpg30  
 TD 88150  
 SOLVENT C6D6  
 NS 64  
 DS 0  
 SWH 65789.477 Hz  
 FIDRES 0.746336 Hz  
 AQ 0.6699400 sec  
 RG 23100  
 DW 7.600 usec  
 DE 6.00 usec  
 TE 299.2 K  
 D1 1.00000000 sec  
 D11 0.03000000 sec  
 TD0 1

===== CHANNEL f1 =====  
 NUC1 31P  
 P1 11.00 usec  
 PL1 -3.00 dB  
 PL1W 45.10684967 W  
 SFO1 161.9674970 MHz

===== CHANNEL f2 =====  
 CPDPRG2 waltz16  
 NUC2 1H  
 PCPD2 80.00 usec  
 PL2 -3.00 dB  
 PL12 11.77 dB  
 PL13 13.14 dB  
 PL2W 16.03799057 W  
 PL12W 0.53474891 W  
 PL13W 0.39007664 W  
 SFO2 400.1120007 MHz

F2 - Processing parameters  
 SI 131072  
 SF 161.9674970 MHz  
 WDW EM  
 SSB 0  
 LB 3.00 Hz  
 GB 0  
 PC 1.40

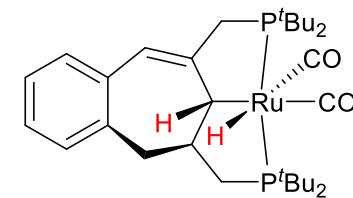*syn-4*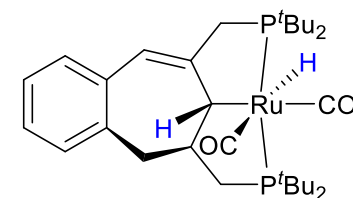*anti-4*

<sup>1</sup>H NMR spectrum of compound 5

1H\_NMR\_CD2Cl2\_(BCH-PtBu2-Ru(CO)2)BArF24

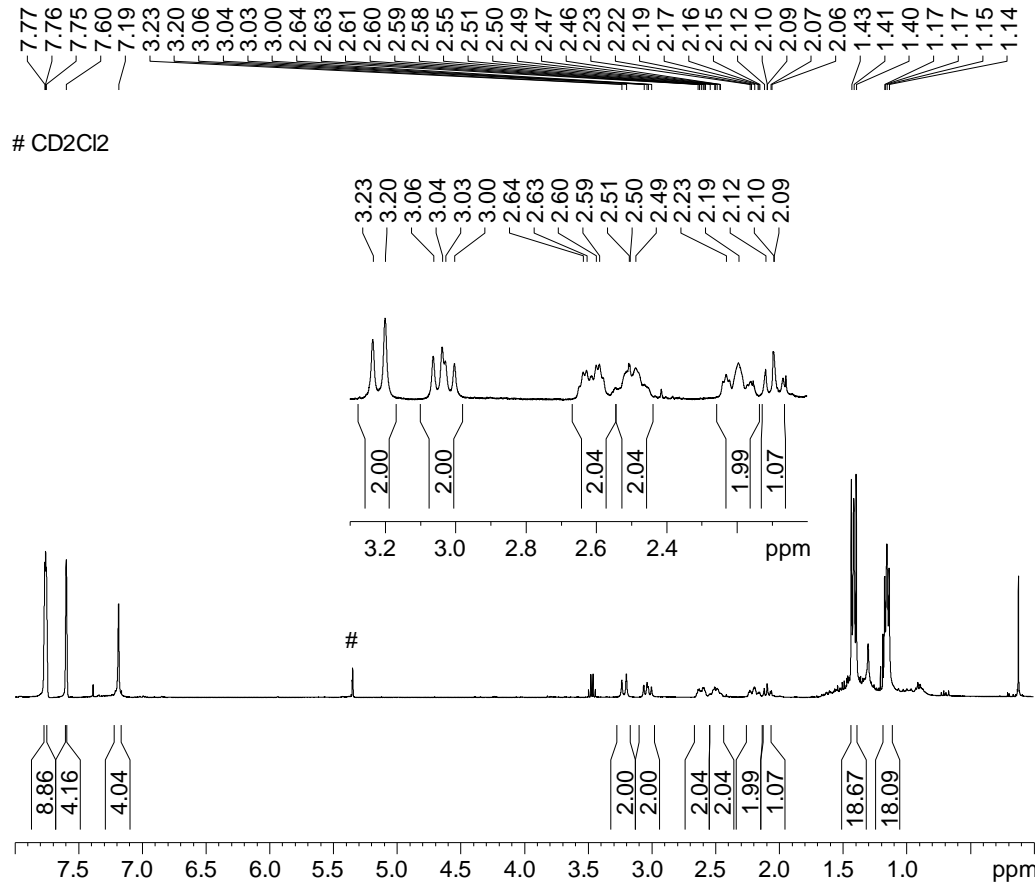

Current Data Parameters  
 NAME NW88-041218-Nacht  
 EXPNO 10  
 PROCNO 1

F2 - Acquisition Parameters  
 Date\_ 20181204  
 Time 20.12  
 INSTRUM spect  
 PROBHD 5 mm QNP 1H/13  
 PULPROG zg30  
 TD 52656  
 SOLVENT CD2Cl2  
 NS 64  
 DS 0  
 SWH 4000.000 Hz  
 FIDRES 0.075965 Hz  
 AQ 6.5819998 sec  
 RG 228  
 DW 125.000 usec  
 DE 6.00 usec  
 TE 299.2 K  
 D1 1.00000000 sec  
 TDO 1

===== CHANNEL f1 =====  
 NUC1 1H  
 P1 14.60 usec  
 PL1 -3.00 dB  
 PL1W 16.03799057 W  
 SFO1 400.1120006 MHz

F2 - Processing parameters  
 SI 65536  
 SF 400.1100000 MHz  
 WDW EM  
 SSB 0  
 LB 0 Hz  
 GB 0  
 PC 1.00

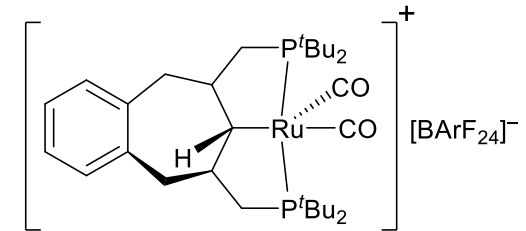

$^{13}\text{C}\{^1\text{H}\}$  NMR spectrum of compound **5**

13C\_NMR\_CD2Cl2\_(BCH-PtBu2-Ru(CO)2)BARF24

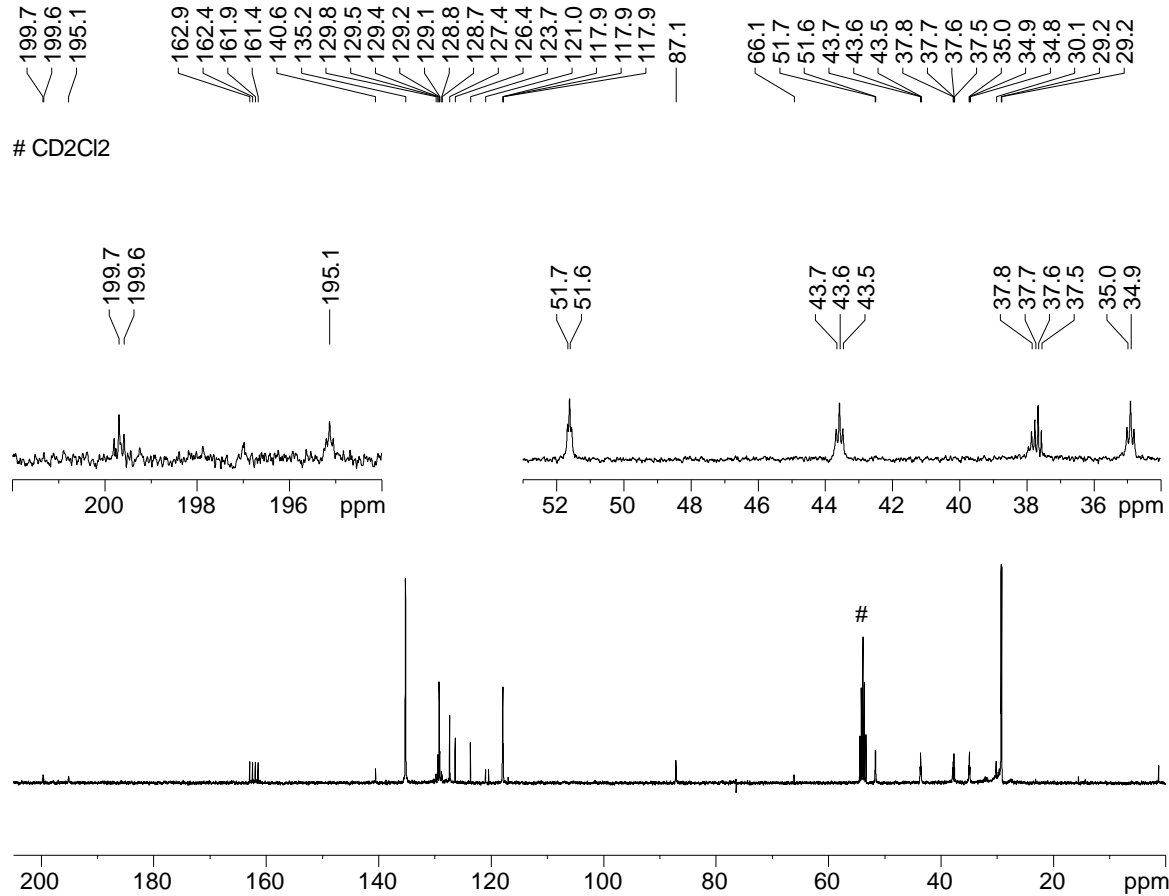

# CD2Cl2

Current Data Parameters  
 NAME NW88-091218-Nacht\_2  
 EXPNO 14  
 PROCNO 1

F2 - Acquisition Parameters  
 Date\_ 20181210  
 Time 7.47  
 INSTRUM spect  
 PROBHD 5 mm QNP 1H/13  
 PULPROG udeflt  
 TD 22218  
 SOLVENT CD2Cl2  
 NS 11300  
 DS 0  
 SWH 30864.197 Hz  
 FIDRES 1.389153 Hz  
 AQ 0.3599316 sec  
 RG 32800  
 DW 16.200 usec  
 DE 6.00 usec  
 TE 299.2 K  
 D1 3.00000000 sec  
 D11 0.03000000 sec  
 D12 0.00002000 sec  
 D20 100.00000000 sec  
 TDO 1

==== CHANNEL f1 =====  
 NUC1 13C  
 P1 13.50 usec  
 P13 2000.00 usec  
 P26 500.00 usec  
 PL1 -4.16 dB  
 PL1W 78.55633545 W  
 SFO1 100.6198135 MHz  
 SP8 1.39 dB  
 SP13 1.39 dB  
 SPNAM[8] Crp60.0.5.20.1  
 SPNAM[13] Crp60comp.4  
 SPOAL8 0.500  
 SPOAL13 0.500  
 SPOFFS8 0 Hz  
 SPOFFS13 0 Hz

==== CHANNEL f2 =====  
 CPDPRG2 waltz16  
 NUC2 1H  
 PCPD2 80.00 usec  
 PL2 -3.00 dB  
 PL12 11.77 dB  
 PL2W 16.03799057 W  
 PL12W 0.53474891 W  
 SFO2 400.1120007 MHz

F2 - Processing parameters  
 SI 131072  
 SF 100.6076941 MHz  
 WDW EM  
 SSB 0  
 LB 2.00 Hz  
 GB 0  
 PC 1.40

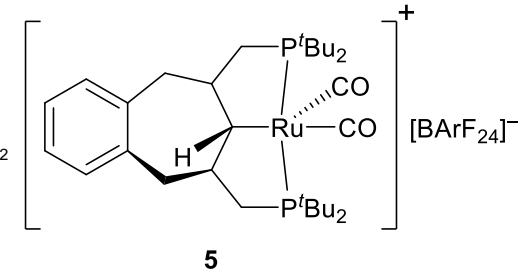

$^{19}\text{F}\{^1\text{H}\}$  NMR spectrum of compound **5**

19F\_NMR\_CD2Cl2\_(BCH-PtBu2-Ru(CO)2)BArF24

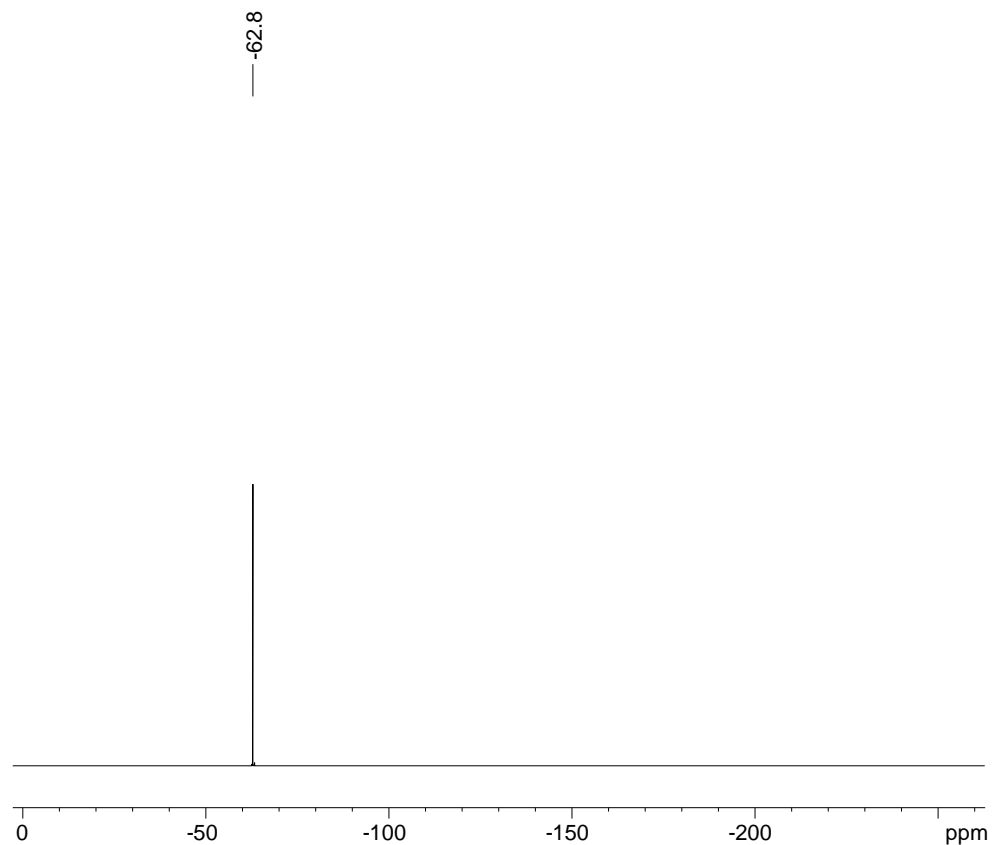

Current Data Parameters  
 NAME NW88-041218-Nacht  
 EXPNO 18  
 PROCNO 1

F2 - Acquisition Parameters  
 Date\_ 20180903  
 Time 16.11  
 INSTRUM spect  
 PROBHD 5 mm QNP 1H/13  
 PULPROG zgfhigqn  
 TD 131072  
 SOLVENT CD2Cl2  
 NS 32  
 DS 0  
 SWH 100000.000 Hz  
 FIDRES 0.762939 Hz  
 AQ 0.6553600 sec  
 RG 4100  
 DW 5.000 usec  
 DE 6.00 usec  
 TE 299.2 K  
 D1 1.00000000 sec  
 D11 0.03000000 sec  
 D12 0.00002000 sec  
 TD0 1

===== CHANNEL f1 =====  
 NUC1 19F  
 P1 18.75 usec  
 PL1 -2.92 dB  
 PL1W 30.50645256 W  
 SFO1 376.4306030 MHz

===== CHANNEL f2 =====  
 CPDPRG2 waltz16  
 NUC2 1H  
 PCPD2 80.00 usec  
 PL2 -3.00 dB  
 PL12 11.77 dB  
 PL2W 16.03799057 W  
 PL12W 0.53474891 W  
 SFO2 400.1120007 MHz

F2 - Processing parameters  
 SI 262144  
 SF 376.4795470 MHz  
 WDW EM  
 SSB 0  
 LB 2.00 Hz  
 GB 0  
 PC 1.00

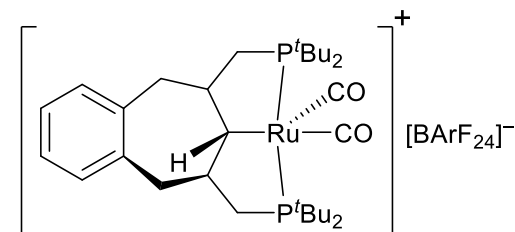**5**



$^{31}\text{P}\{^1\text{H}\}$  NMR spectrum of compound **5**

31P\_NMR\_CD2Cl2\_(BCH-PtBu2-Ru(CO)2)BArF24

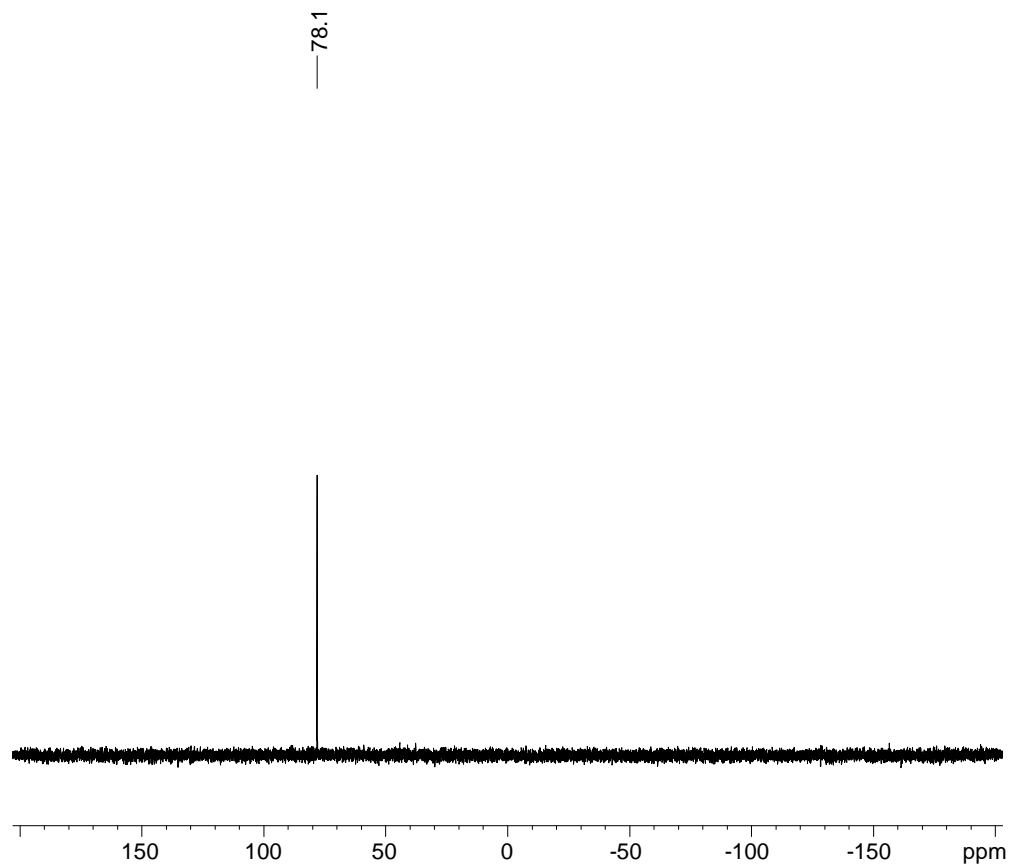

Current Data Parameters  
 NAME NW88-041218-Nacht  
 EXPNO 11  
 PROCNO 1

F2 - Acquisition Parameters  
 Date\_ 20181204  
 Time 20.14  
 INSTRUM spect  
 PROBHD 5 mm QNP 1H/13  
 PULPROG zgpg30  
 TD 88150  
 SOLVENT CD2Cl2  
 NS 64  
 DS 0  
 SWH 65789.477 Hz  
 FIDRES 0.746336 Hz  
 AQ 0.6699400 sec  
 RG 23100  
 DW 7.600 usec  
 DE 6.00 usec  
 TE 299.2 K  
 D1 1.00000000 sec  
 D11 0.03000000 sec  
 TD0 1

===== CHANNEL f1 =====  
 NUC1 31P  
 P1 11.00 usec  
 PL1 -3.00 dB  
 PL1W 45.10684967 W  
 SFO1 161.9674970 MHz

===== CHANNEL f2 =====  
 CPDPRG2 waltz16  
 NUC2 1H  
 PCPD2 80.00 usec  
 PL2 -3.00 dB  
 PL12 11.77 dB  
 PL13 13.14 dB  
 PL2W 16.03799057 W  
 PL12W 0.53474891 W  
 PL13W 0.39007664 W  
 SFO2 400.1120007 MHz

F2 - Processing parameters  
 SI 131072  
 SF 161.9674970 MHz  
 WDW EM  
 SSB 0  
 LB 3.00 Hz  
 GB 0  
 PC 1.40

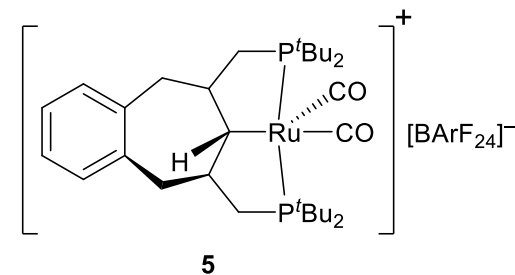

<sup>1</sup>H NMR spectrum of **6**

1H\_NMR\_C6D6\_BCH-PtBu2-Ru(CO)2H

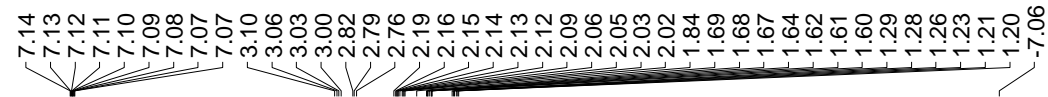

# C6D6

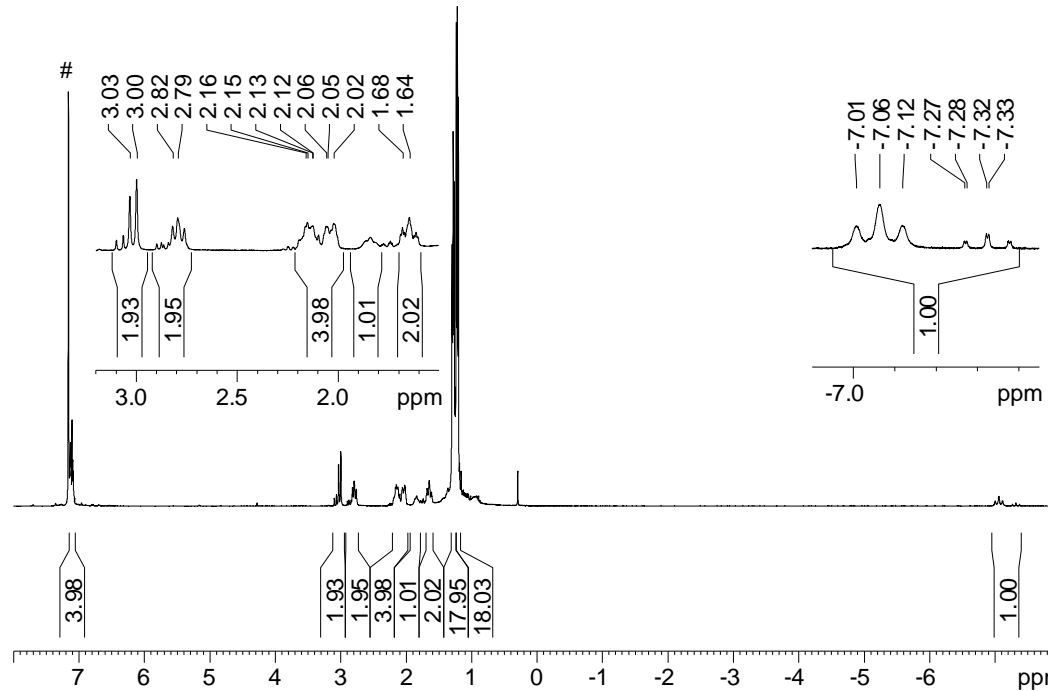

Current Data Parameters  
 NAME NW159-131218-Nacht  
 EXPNO 10  
 PROCNO 1

F2 - Acquisition Parameters  
 Date\_ 20181213  
 Time 20.06  
 INSTRUM spect  
 PROBHD 5 mm QNP 1H/13  
 PULPROG zg30  
 TD 52656  
 SOLVENT C6D6  
 NS 32  
 DS 0  
 SWH 8305.647 Hz  
 FIDRES 0.157734 Hz  
 AQ 3.1698911 sec  
 RG 161  
 DW 60.200 usec  
 DE 6.00 usec  
 TE 299.2 K  
 D1 1.0000000 sec  
 TD0 1

===== CHANNEL f1 =====  
 NUC1 1H  
 P1 14.60 usec  
 PL1 -3.00 dB  
 PL1W 16.03799057 W  
 SFO1 400.1100000 MHz

F2 - Processing parameters  
 SI 65536  
 SF 400.1099924 MHz  
 WDW EM  
 SSB 0  
 LB 0 Hz  
 GB 0  
 PC 1.00

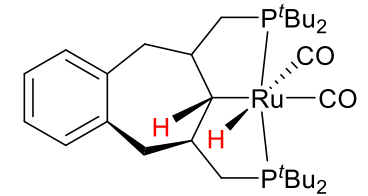*syn-6*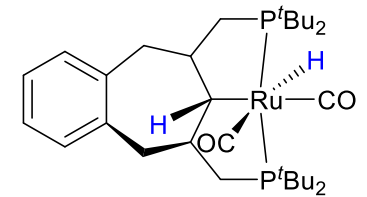*anti-6*

$^{13}\text{C}$   $\{^1\text{H}\}$  NMR spectrum of **6**

13C\_NMR\_C6D6\_BCH-PtBu2-Ru(CO)2H

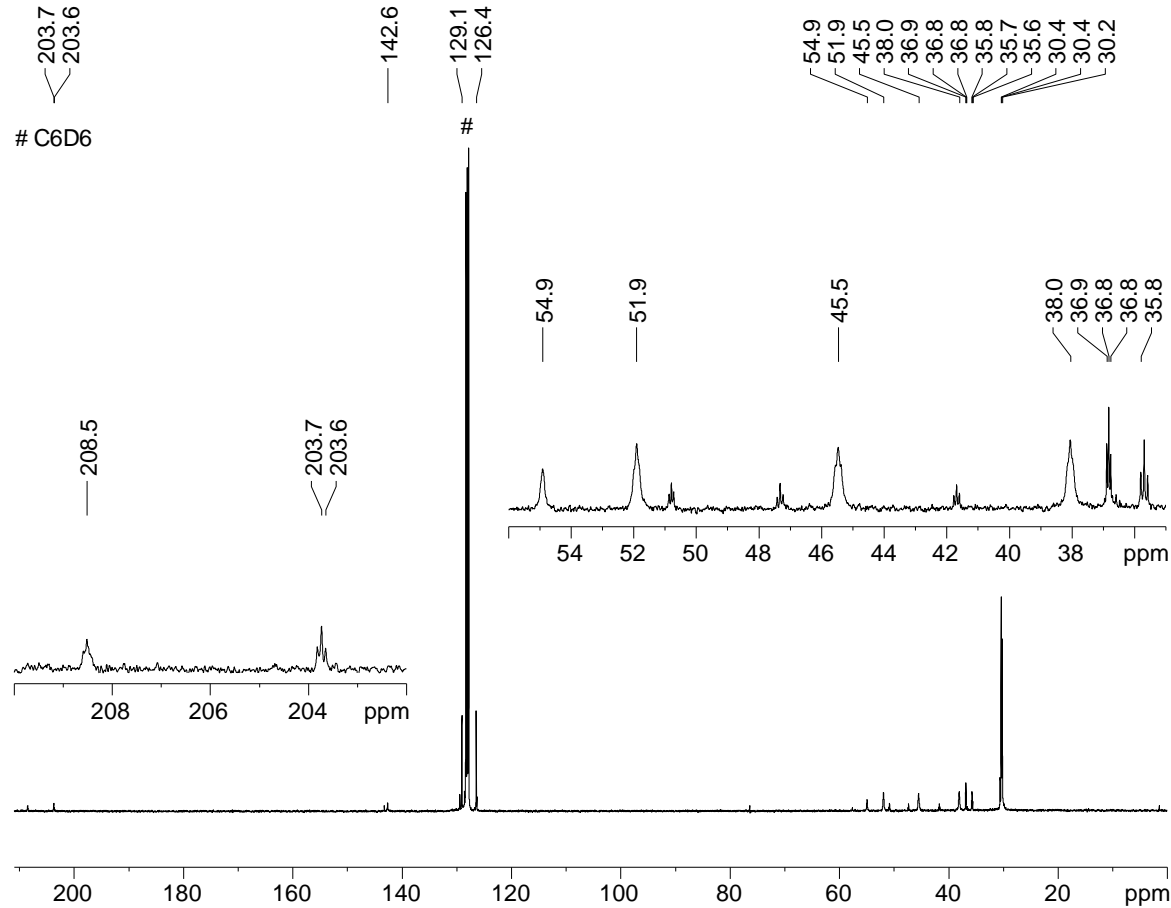

Current Data Parameters  
 NAME NW159-131218-Nacht\_2  
 EXPNO 13  
 PROCNO 1

F2 - Acquisition Parameters  
 Date\_ 20181214  
 Time 4.55  
 INSTRUM spect  
 PROBHD 5 mm QNP 1H/13  
 PULPROG udef1  
 TD 22218  
 SOLVENT C6D6  
 NS 7500  
 DS 0  
 SWH 30864.197 Hz  
 FIDRES 1.389153 Hz  
 AQ 0.3599316 sec  
 RG 32800  
 DW 16.200 usec  
 DE 6.00 usec  
 TE 299.2 K  
 D1 3.0000000 sec  
 D11 0.0300000 sec  
 D12 0.0000200 sec  
 D20 100.0000000 sec  
 TD0 1

===== CHANNEL f1 =====  
 NUC1 13C  
 P1 13.50 usec  
 P13 2000.00 usec  
 P26 500.00 usec  
 PL1 -4.16 dB  
 PL1W 78.55633545 W  
 SFO1 100.6198135 MHz  
 SP8 1.39 dB  
 SP13 1.39 dB  
 SPNAM[8] Crp60,0.5,20.1  
 SPNAM[13] Crp60comp.4  
 SPOAL8 0.500  
 SPOAL13 0.500  
 SPOFFS8 0 Hz  
 SPOFFS13 0 Hz

===== CHANNEL f2 =====  
 CPDPRG2 waltz16  
 NUC2 1H  
 PCPD2 80.00 usec  
 PL2 -3.00 dB  
 PL12 11.77 dB  
 PL2W 16.03799057 W  
 PL12W 0.53474891 W  
 SFO2 400.1120007 MHz

F2 - Processing parameters  
 SI 131072  
 SF 100.6077013 MHz  
 WDW EM  
 SSB 0  
 LB 2.00 Hz  
 GB 0  
 PC 1.40

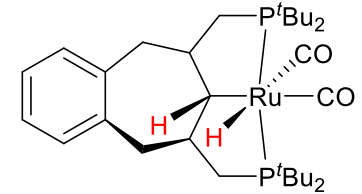*syn-6*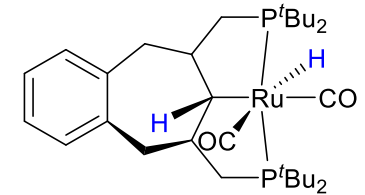*anti-6*

$^{31}\text{P}\{^1\text{H}\}$  NMR spectrum of **6**

31P\_NMR\_C6D6\_BCH-PtBu2-Ru(CO)2H

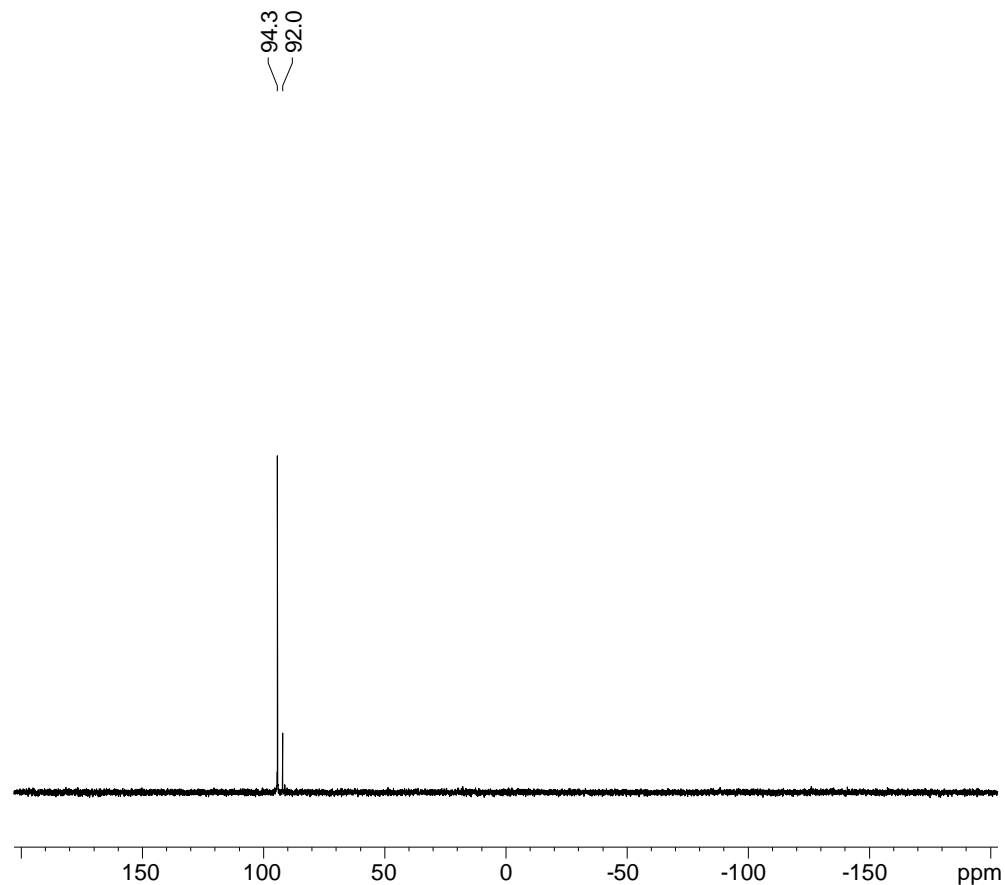

Current Data Parameters  
 NAME NW159-131218-Nacht  
 EXPNO 11  
 PROCNO 1

F2 - Acquisition Parameters  
 Date\_ 20181213  
 Time 20.08  
 INSTRUM spect  
 PROBHD 5 mm QNP 1H/13  
 PULPROG zgpg30  
 TD 88150  
 SOLVENT C6D6  
 NS 64  
 DS 0  
 SWH 65789.477 Hz  
 FIDRES 0.746336 Hz  
 AQ 0.6699400 sec  
 RG 23100  
 DW 7.600 usec  
 DE 6.00 usec  
 TE 299.2 K  
 D1 1.00000000 sec  
 D11 0.03000000 sec  
 TD0 1

===== CHANNEL f1 =====  
 NUC1 31P  
 P1 11.00 usec  
 PL1 -3.00 dB  
 PL1W 45.10684967 W  
 SFO1 161.9674970 MHz

===== CHANNEL f2 =====  
 CPDPRG[2] waltz16  
 NUC2 1H  
 PCPD2 80.00 usec  
 PL2 -3.00 dB  
 PL12 11.77 dB  
 PL13 13.14 dB  
 PL2W 16.03799057 W  
 PL12W 0.53474891 W  
 PL13W 0.39007664 W  
 SFO2 400.1120007 MHz

F2 - Processing parameters  
 SI 131072  
 SF 161.9674970 MHz  
 WDW EM  
 SSB 0  
 LB 3.00 Hz  
 GB 0  
 PC 1.40

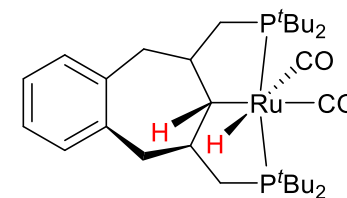*syn-6*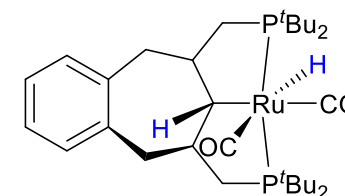*anti-6*
